# Supplementary material for: Investigation of the mechanism of small size effect in carbon-based supercapacitors
Source: Royal Society of Chemistry journal article supplement (doi:10.1039/d1nr02765d), 2021-01-01
Supplement: d1nr02765d1.pdf [file d1nr02765d1.pdf]

## Supporting Information

### Investigation of the Mechanism of Small Size Effect in Carbon-based Supercapacitors

Chenyang Zhao <sup>&a</sup>, Chengyao Zhao <sup>&b</sup>, Qi Liu <sup>b</sup>, Xiaohui Liu <sup>b</sup>, Xiaotong Lu <sup>b</sup>, Chaoran Pang <sup>b</sup>, Yujing Liu <sup>\*b</sup>, Zhongqiu Liu <sup>b</sup>, Anguo Ying <sup>\*b</sup>

*a. School of Chemical Engineering and Technology, Tianjin University, P. R. China*

*b. School of Chemistry and Chemical Engineering, Qufu Normal University, P. R. China*

*\*Corresponding authors.*

E-mail addresses: gltylyj@163.com (Y. Liu); yinganguo@163.com or agying@qfnu.edu.cn (A. Ying)

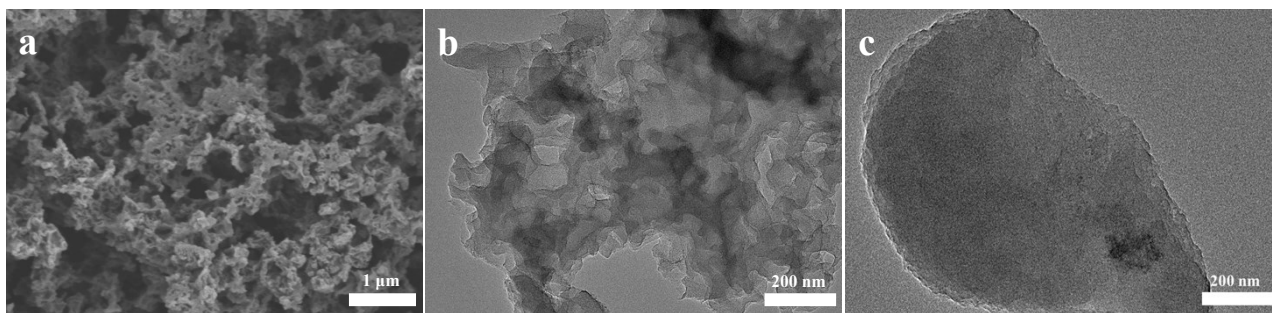

**Figure S1.** (a) The SEM image of PILMC after modification by ball-milling, (b) The TEM image of PILMC after modification by ball-milling, (c) The SEM image of internal features of PILM/PAN-L.

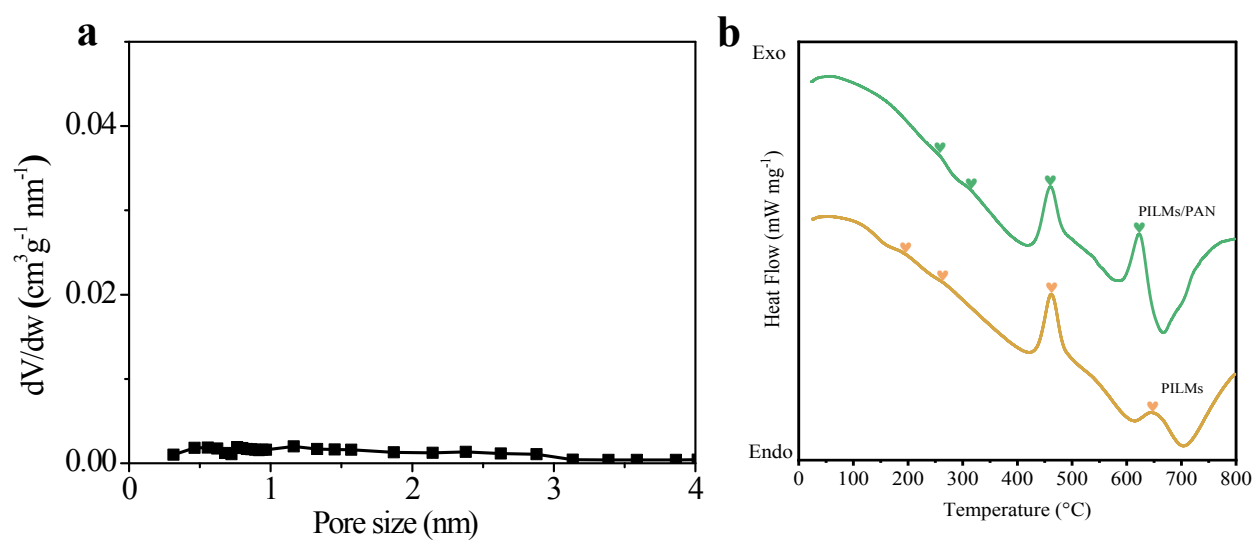

**Figure S2.** (a) Nitrogen adsorption-desorption isotherm of PAN-loaded PILMs by the stepwise method, (b) DSC curves of PILMs and PILMs/PAN.

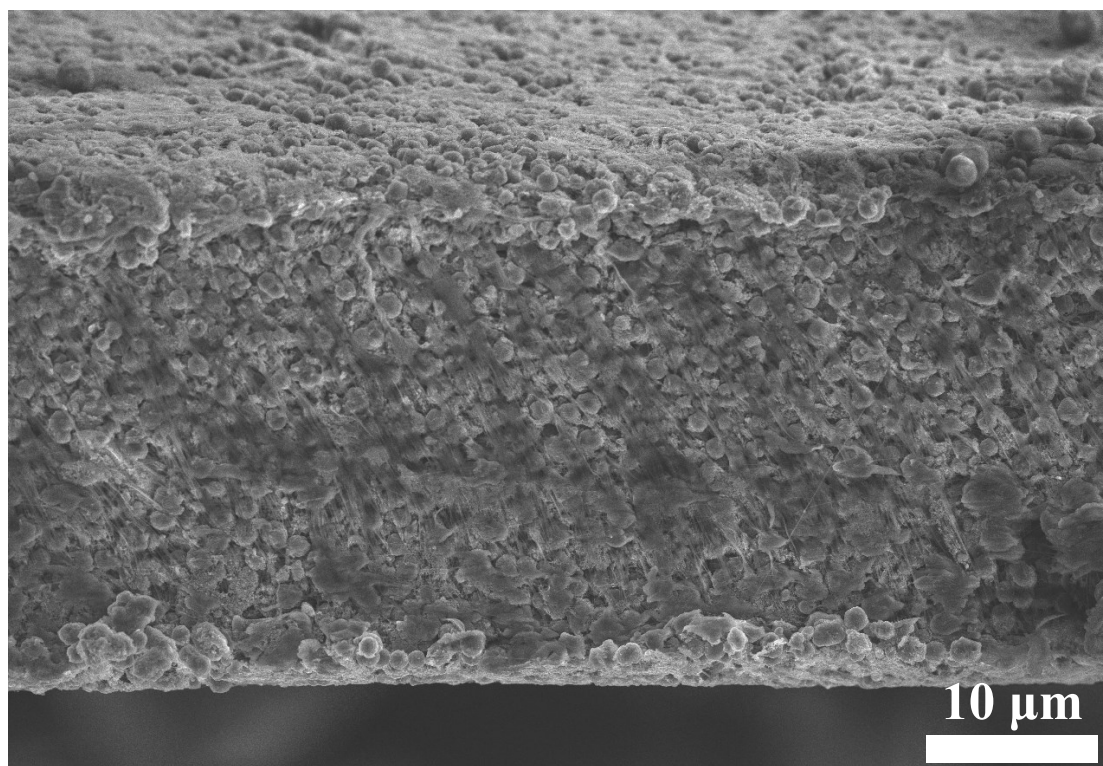

**Figure S3.** The cross-sectional SEM image of the carbon materials (PILMC/PAN-L) within the electrode.

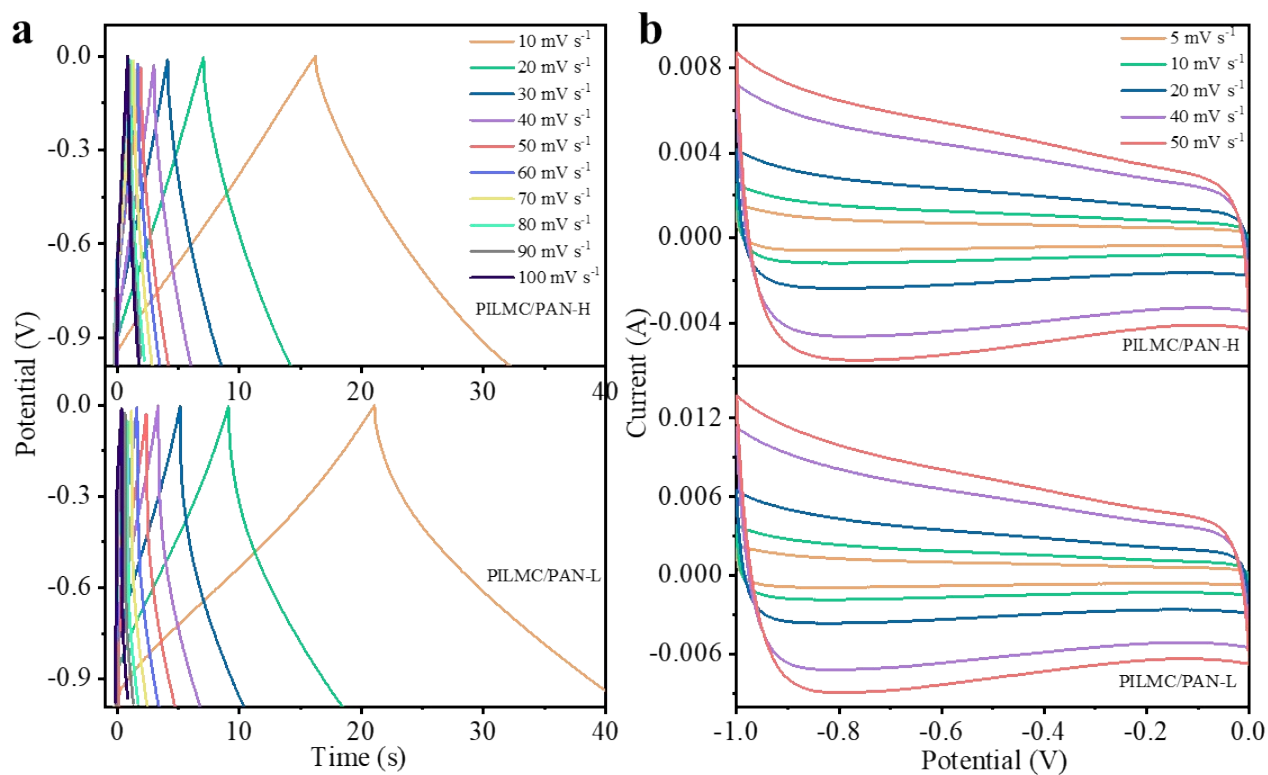

**Figure S4.** (a) CV curves of PILMCs/PAN-x, (b) GCD curves of PILMCs/PAN-x.

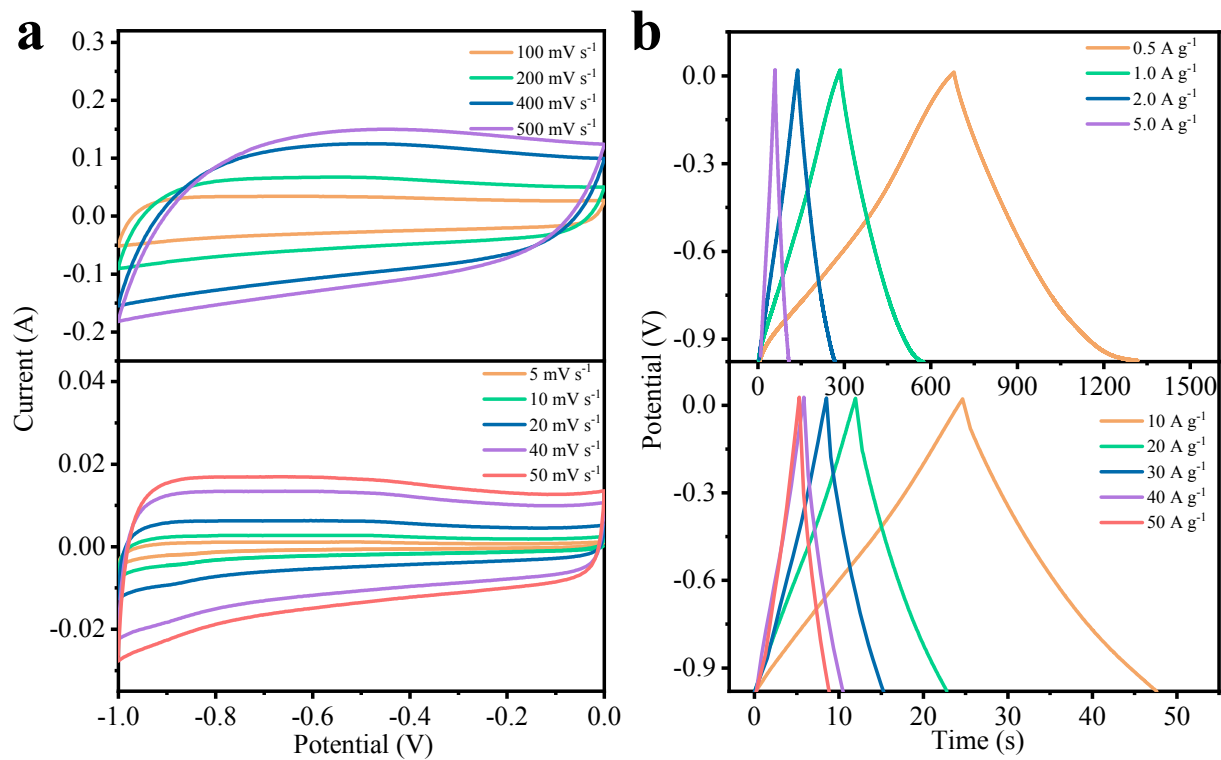

**Figure S5.** (a) CV curves of commercial activated carbon at different scan rates, (b) GCD curves of commercial activated carbon at different current densities.

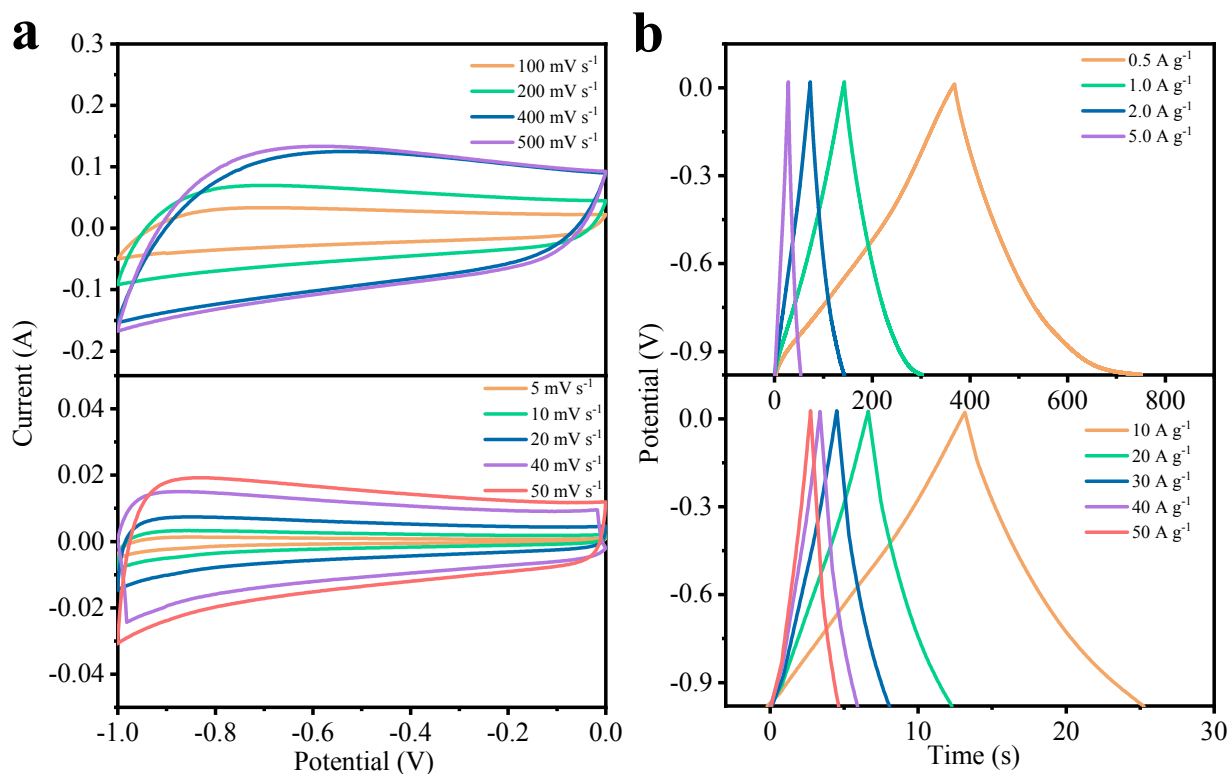

**Figure S6.** (a) CV curves of PILMC/PAN-L with mass loading of 5 mg cm<sup>-2</sup> at different scan rates, (b) GCD curves of PILMC/PAN-L with mass loading of 5 mg cm<sup>-2</sup> at different current densities.

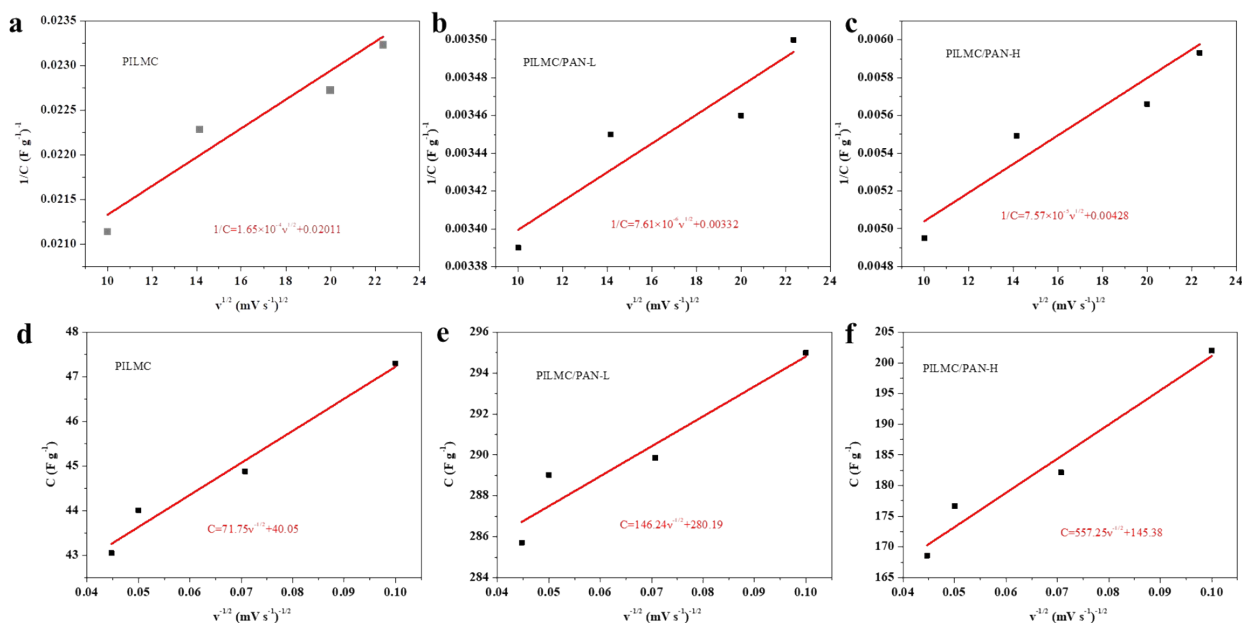

**Figure S7.** Plots of reciprocal of calculated gravimetric capacity ( $C^{-1}$ ) vs. square root of scan rate ( $v^{1/2}$ ) of the (a) PILMC, (b) PILMC/PAN-L, (c) PILMC/PAN-H; Plots of calculated gravimetric capacity ( $C$ ) vs. reciprocal of square root of scan rate ( $v^{-1/2}$ ) of the (d) PILMC, (e) PILMC/PAN-L, (f) PILMC/PAN-H.



**Table S1** Elemental composition of PILMCs/PAN-x via XPS survey.

| <b>Element</b> | <b>C</b>      | <b>N</b>      | <b>O</b>      | <b>Br</b>     |
|----------------|---------------|---------------|---------------|---------------|
| <b>Sample</b>  | <b>(wt %)</b> | <b>(wt %)</b> | <b>(wt %)</b> | <b>(wt %)</b> |
| PILMC          | 89.55         | 2.21          | 7.59          | 0.65          |
| PILMC/PAN-L    | 86.52         | 2.56          | 9.89          | 1.03          |
| PILMC/PAN-H    | 85.70         | 6.08          | 7.58          | 0.64          |
